# Supplementary material for: Towards the new normal: Transcriptomic convergence and genomic legacy of the two subgenomes of an allopolyploid weed (Capsella bursa-pastoris)
Source: PubMed Central journal article supplement (PMC6532933; doi:10.1371/journal.pgen.1008131), 2019-05-13
Supplement: pgen.1008131.s001.pdf [file pgen.1008131.s001.pdf]

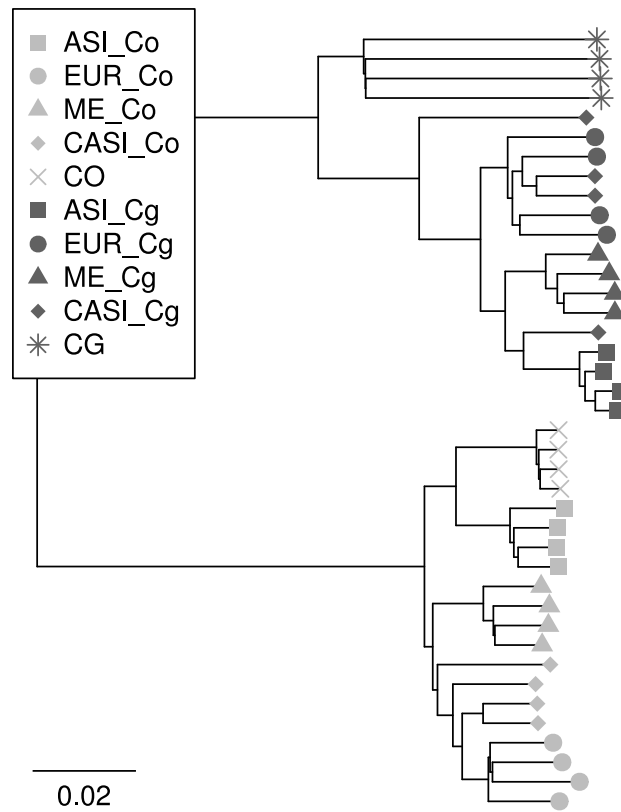

**Fig. S1. Neighbor-joining tree of the genomic data of three *Capsella* species.** CO, CG, ASI, EUR, ME, CASI correspond to textit*C. orientalis*, *C. grandiflora*, and four populations of *C. bursa-pastoris*, respectively. The two subgenomes are indicated with Co and Cg. The tree was reconstructed from 11Mb of SNPs and the distance was then scaled to whole genome variation.
