# Supplementary material for: Towards the new normal: Transcriptomic convergence and genomic legacy of the two subgenomes of an allopolyploid weed (Capsella bursa-pastoris)
Source: PubMed Central journal article supplement (PMC6532933; doi:10.1371/journal.pgen.1008131), 2019-05-13
Supplement: pgen.1008131.s002.pdf [file pgen.1008131.s002.pdf]

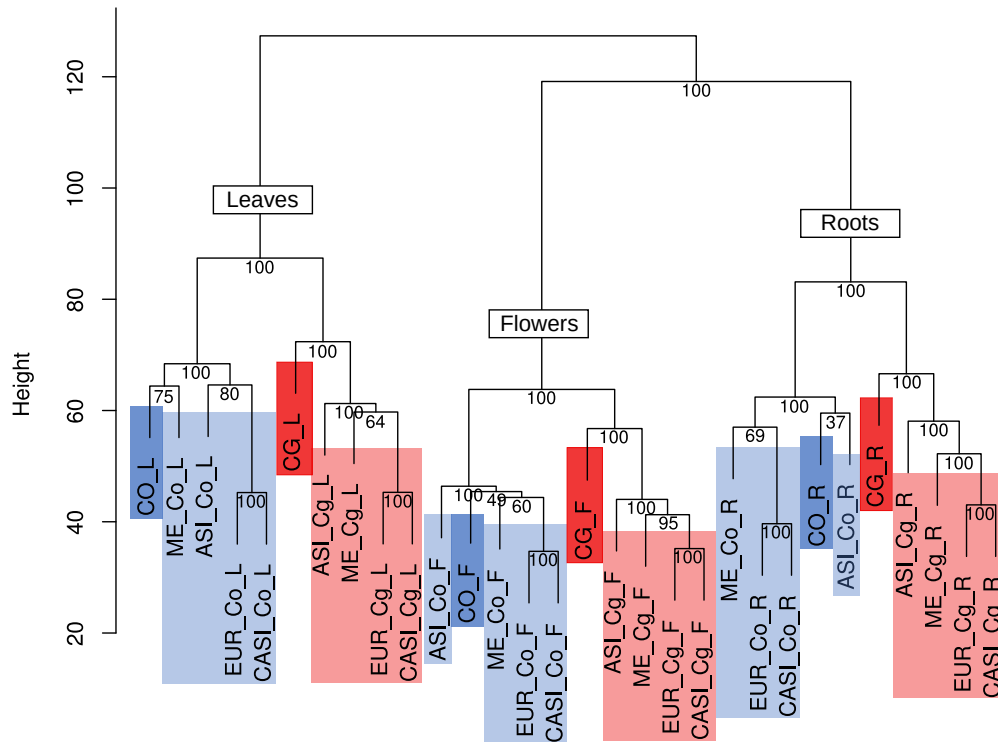

**Fig. S2. Distance clustering dendrogram of gene expression data for different populations.** Clustering was performed using Euclidean distances and the average agglomerative method on mean expression values for each population (10,403 genes). *CO* and *CG* correspond to diploid species *C. orientalis* and *C. grandiflora*, respectively. The Asian, European and Middle Eastern populations of *C. bursa-pastoris* are called ASI, EUR and ME, and the two subgenomes are indicated with Co and Cg. F, L, and R stand for flower, leaf and root tissues, respectively. Bootstrap support was generated from 1000 replicates. Color boxes indicate different species and subgenomes.
