# Supplementary material for: Towards the new normal: Transcriptomic convergence and genomic legacy of the two subgenomes of an allopolyploid weed (Capsella bursa-pastoris)
Source: PubMed Central journal article supplement (PMC6532933; doi:10.1371/journal.pgen.1008131), 2019-05-13
Supplement: pgen.1008131.s005.pdf [file pgen.1008131.s005.pdf]

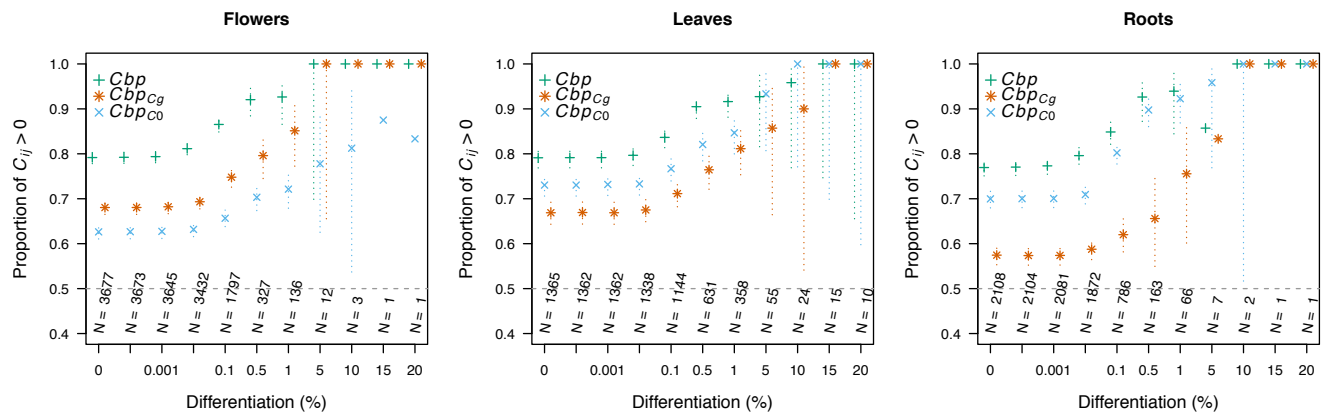

**Fig. S5. Subgenomes convergence in *C. bursa-pastoris* given differentiation from parental expression.** For each tissue, and each subgenome  $i$ , the proportion of transcripts  $j$  showing convergence (i.e.,  $C_{ij} > 0$ ) are reported as a function of differentiation from parental expression with the associated 95% confidence intervals (dotted lines, non-significant when absent). As an indication of power for binomial tests, the number of gene considered for the various threshold of differentiation for the overall  $Cbp$  convergence are indicated ( $N$ ).
