# Supplementary material for: Towards the new normal: Transcriptomic convergence and genomic legacy of the two subgenomes of an allopolyploid weed (Capsella bursa-pastoris)
Source: PubMed Central journal article supplement (PMC6532933; doi:10.1371/journal.pgen.1008131), 2019-05-13
Supplement: pgen.1008131.s006.pdf [file pgen.1008131.s006.pdf]

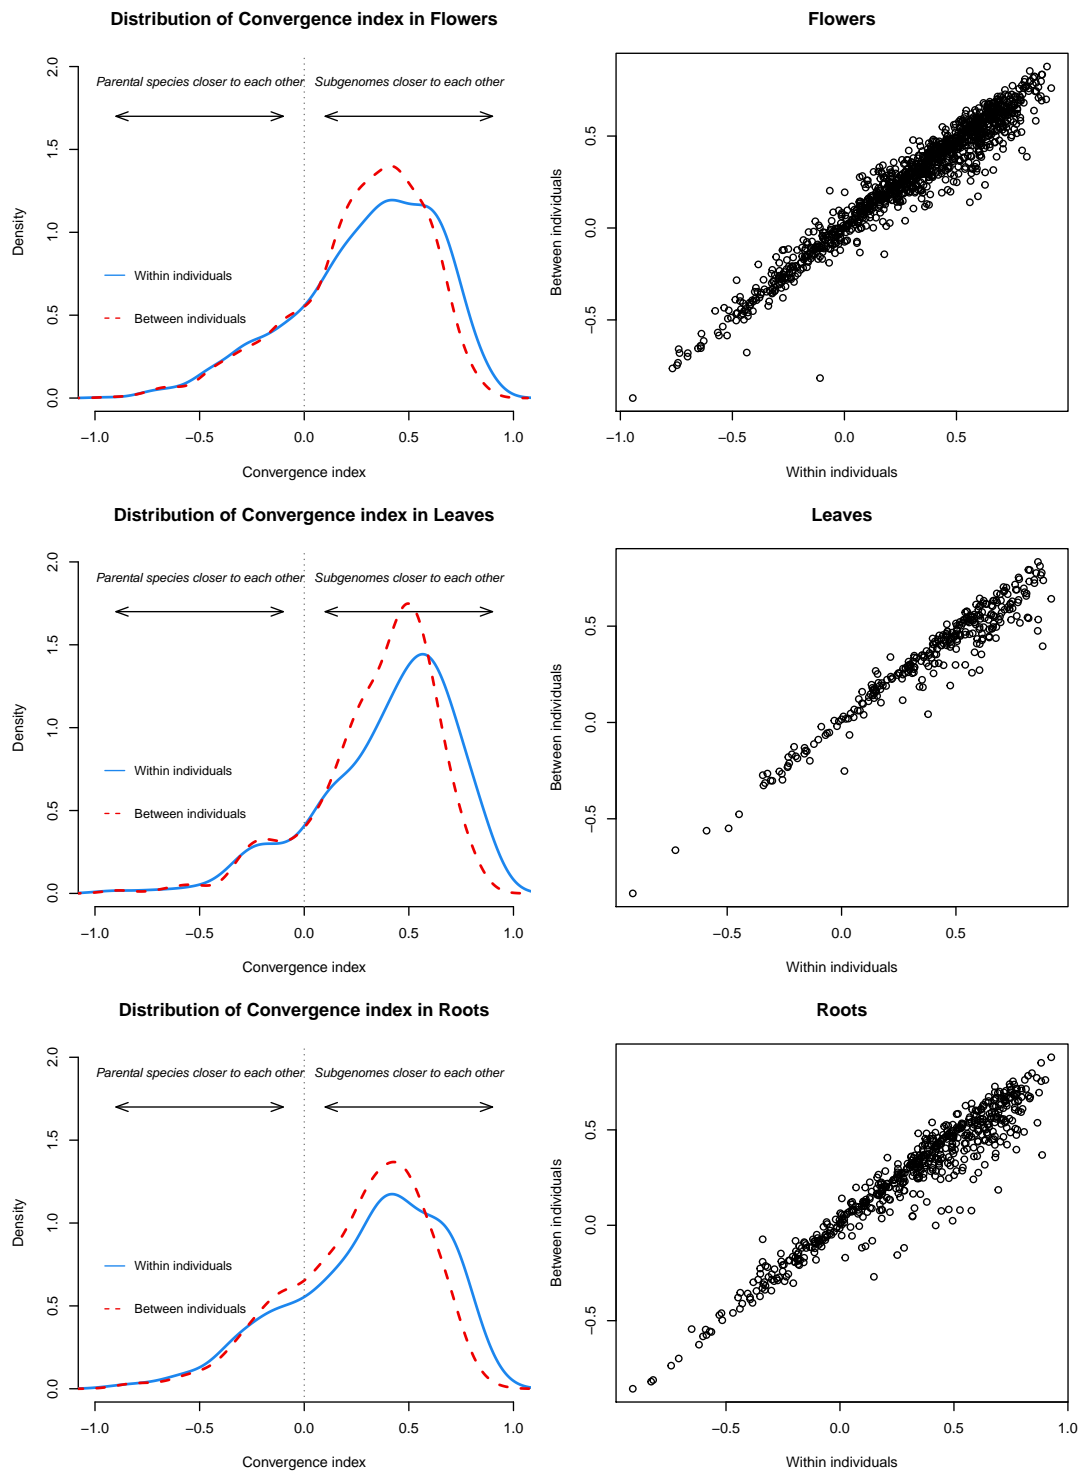

**Fig. S6. Overall convergence indices estimated for *C. bursa-pastoris* subgenomes coming from the same individuals or from different individuals.** The overall convergence indices,  $C$ , were computed from  $Cbp_{Co}$  and  $Cbp_{Cg}$  subgenomes expression levels from the same individuals (within individuals) or from different individuals (between individuals). The left panels show the distribution of  $C$  indices, and the right panels show the correlation between the two groups of estimates.
