# Supplementary material for: Towards the new normal: Transcriptomic convergence and genomic legacy of the two subgenomes of an allopolyploid weed (Capsella bursa-pastoris)
Source: PubMed Central journal article supplement (PMC6532933; doi:10.1371/journal.pgen.1008131), 2019-05-13
Supplement: pgen.1008131.s009.pdf [file pgen.1008131.s009.pdf]

**A]**

- $C_{Co}$
- $C_{Cg}$
- ▲  $C_{Cg}$  and  $C_{Co}$

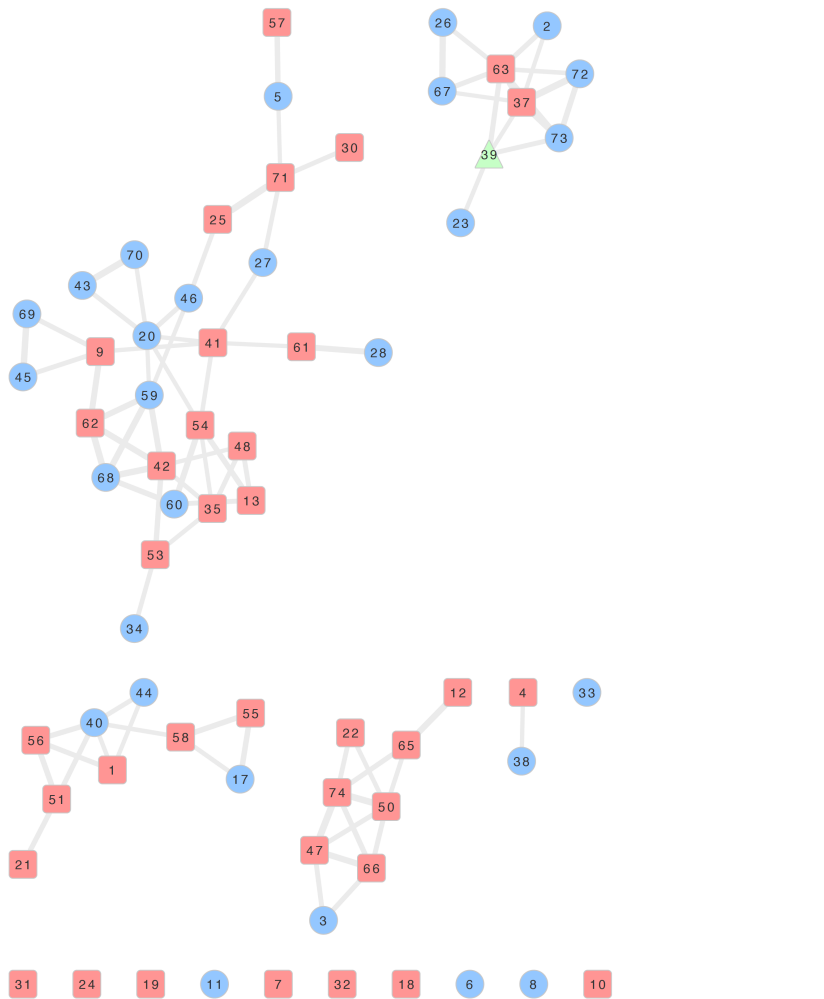

- |                                              |                                                                 |                                                                   |
|----------------------------------------------|-----------------------------------------------------------------|-------------------------------------------------------------------|
| 1: response to reactive oxygen species       | 28: double-strand break repair                                  | 52: auxin-activated signaling pathway                             |
| 2: vacuolar transport                        | 29: double-strand break repair via homologous recombination     | 53: glutamate biosynthesis                                        |
| 3: phloem development                        | 30: proteolysis                                                 | 54: pyrimidine nucleotide biosynthesis                            |
| 4: cellulose microfibril organization        | 31: response to karrikin                                        | 55: response to bacterium                                         |
| 5: protein peptidyl-prolyl isomerization     | 32: response to wounding                                        | 56: brassinosteroid mediated signaling pathway                    |
| 6: protein folding                           | 33: oxidation-reduction process                                 | 57: peptidyl-diphthamide biosynthesis                             |
| 7: regulation of nitrogen utilization        | 34: riboflavin biosynthesis                                     | 58: response to molecule of bacterial origin                      |
| 8: carbohydrate metabolism                   | 35: tricarboxylic acid cycle                                    | 59: allantoin catabolism                                          |
| 9: mRNA splicing, via spliceosome            | 36: mitochondrial electron transport, ubiquinol to cytochrome c | 60: Mo-molybdopterin cofactor biosynthesis                        |
| 10: primary metabolism                       | 37: metal ion transport                                         | 61: RNA-directed DNA methylation                                  |
| 11: nitric oxide biosynthesis                | 38: tubulin complex assembly                                    | 62: deadenylation-dependent decapping of nuclear-transcribed mRNA |
| 12: cytokinesis by cell plate formation      | 39: drug transmembrane transport                                | 63: transport                                                     |
| 13: phosphatidylinositol dephosphorylation   | 40: response to auxin                                           | 64: transmembrane transport                                       |
| 14: attachment of GPI anchor to protein      | 41: regulation of transcription, DNA-templated                  | 65: male meiosis                                                  |
| 15: ceramide metabolism                      | 42: L-phenylalanine catabolism                                  | 66: floral meristem determinacy                                   |
| 16: sphingolipid biosynthesis                | 43: cell redox homeostasis                                      | 67: ER to Golgi vesicle-mediated transport                        |
| 17: response to insect                       | 44: response to cadmium ion                                     | 68: chlorophyll catabolism                                        |
| 18: L-arabinose metabolism                   | 45: charged-tRNA amino acid modification                        | 69: tRNA threonylcarbamoyladenosine modification                  |
| 19: microtubule-based process                | 46: signal peptide processing                                   | 70: regulation of pH                                              |
| 20: regulation of translational fidelity     | 47: procambium histogenesis                                     | 71: protein ubiquitination                                        |
| 21: regulation of vernalization response     | 48: very long-chain fatty acid metabolism                       | 72: iron ion transport                                            |
| 22: vasculature development                  | 49: fatty acid biosynthesis                                     | 73: ATP hydrolysis coupled proton transport                       |
| 23: polyamine transport                      | 50: vegetative to reproductive phase transition of meristem     | 74: embryo development ending in seed dormancy                    |
| 24: response to arsenic-containing substance | 51: regulation of auxin mediated signaling pathway              |                                                                   |
| 25: protein deubiquitination                 |                                                                 |                                                                   |
| 26: retrograde transport, endosome to Golgi  |                                                                 |                                                                   |
| 27: protein glycosylation                    |                                                                 |                                                                   |

Continue on the next page

**B]**

- $C_{Co}$
- $C_{Cg}$
- ▲  $C_{Cg}$  and  $C_{Co}$

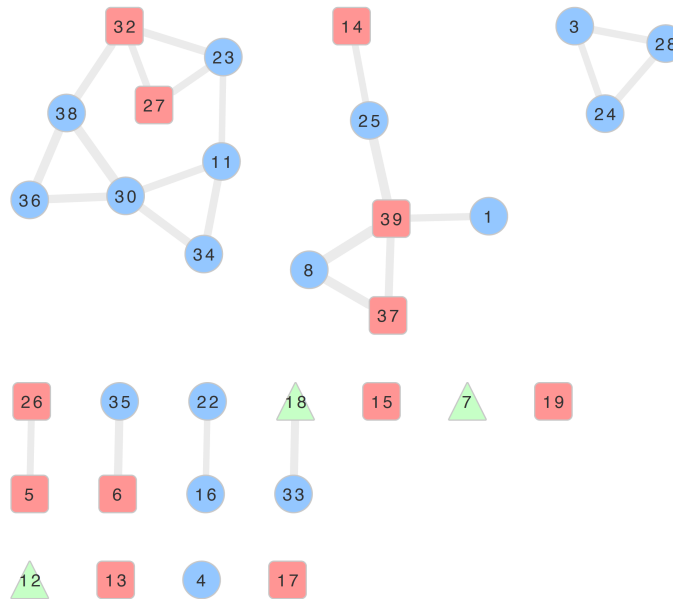

- 1: nuclear division
- 2: mitotic sister chromatid segregation
- 3: drug transmembrane transport
- 4: metabolism
- 5: procambium histogenesis
- 6: regulation of cyclin-dependent protein serine/threonine kinase activity
- 7: carbohydrate metabolism
- 8: DNA repair
- 9: double-strand break repair via homologous recombination
- 10: base-excision repair
- 11: cellular amino acid metabolism
- 12: sucrose metabolism
- 13: proteolysis

- 14: lipid storage
- 15: defense response to oomycetes
- 16: regulation of auxin mediated signaling pathway
- 17: response to wounding
- 18: response to heat
- 19: response to metal ion
- 20: response to water deprivation
- 21: response to cadmium ion
- 22: response to chitin
- 23: 'de novo' IMP biosynthesis
- 24: malate transport
- 25: cell redox homeostasis
- 26: vegetative to reproductive phase transition of meristem

- 27: phosphatidylinositol dephosphorylation
- 28: potassium ion transmembrane transport
- 29: potassium ion transport
- 30: L-phenylalanine catabolism
- 31: tryptophan biosynthesis
- 32: Mo-molybdopterin cofactor biosynthesis
- 33: response to salt stress
- 34: cysteine biosynthesis from serine
- 35: cytokinesis by cell plate formation
- 36: allantoin catabolism
- 37: RNA-directed DNA methylation
- 38: chlorophyll catabolism
- 39: telomere maintenance

Continue on the next page

C]

- $C_{Co}$
- $C_{Cg}$
- ▲  $C_{Cg}$  and  $C_{Co}$

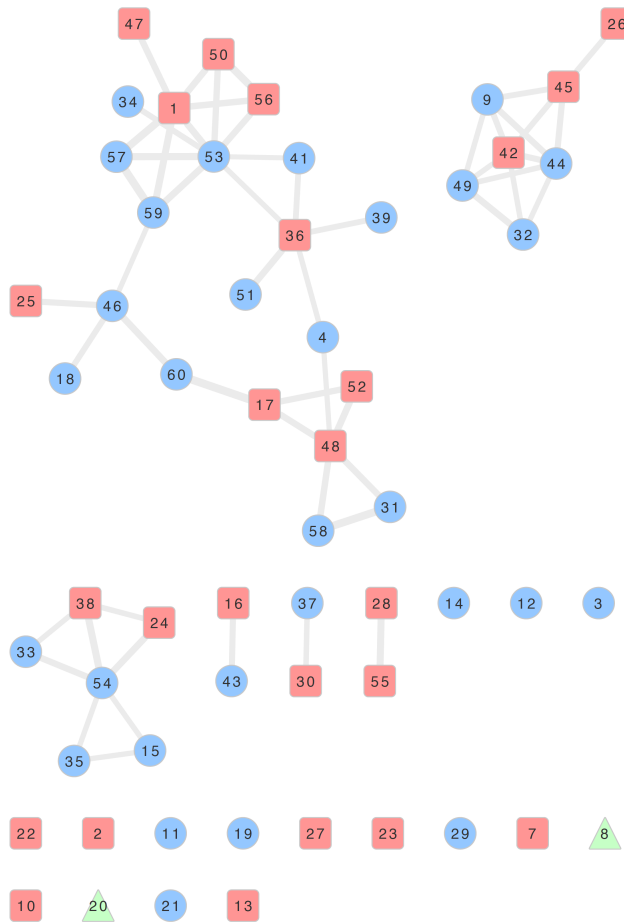

- |                                                       |                                                                             |                                                         |
|-------------------------------------------------------|-----------------------------------------------------------------------------|---------------------------------------------------------|
| 1: GPI anchor biosynthesis                            | 22: phloem or xylem histogenesis                                            | 42: potassium ion transmembrane transport               |
| 2: metabolism                                         | 23: regulation of cyclin-dependent protein serine/threonine kinase activity | 43: protein peptidyl-prolyl isomerization               |
| 3: superoxide metabolism                              | 24: regulation of systemic acquired resistance                              | 44: lipid transport                                     |
| 4: cytokinin metabolism                               | 25: RNA processing                                                          | 45: transport                                           |
| 5: tryptophan biosynthesis                            | 26: vacuolar transport                                                      | 46: regulation of transcription, DNA-templated          |
| 6: cytokinin biosynthesis                             | 27: pollen tube growth                                                      | 47: carotenoid biosynthesis                             |
| 7: polarity specification of adaxial/abaxial axis     | 28: xylan biosynthesis                                                      | 48: telomere maintenance                                |
| 8: carbohydrate metabolism                            | 29: aging                                                                   | 49: nucleotide-sugar transport                          |
| 9: drug transmembrane transport                       | 30: response to abscisic acid                                               | 50: thiamine diphosphate biosynthesis                   |
| 10: biosynthesis                                      | 31: cellular glucose homeostasis                                            | 51: salicylic acid metabolism                           |
| 11: positive regulation of cell proliferation         | 32: basic amino acid transport                                              | 52: base-excision repair                                |
| 12: nuclear-transcribed mRNA poly(A) tail shortening  | 33: response to insect                                                      | 53: 'de novo' IMP biosynthesis                          |
| 13: tRNA wobble position uridine thiolation           | 34: deoxyribonucleoside diphosphate metabolism                              | 54: defense response to fungus                          |
| 14: microtubule-based process                         | 35: response to oxidative stress                                            | 55: sucrose metabolism                                  |
| 15: response to salt stress                           | 36: cellular amino acid metabolism                                          | 56: Mo-molybdopterin cofactor biosynthesis              |
| 16: peptidyl-lysine modification to peptidyl-hypusine | 37: response to cadmium ion                                                 | 57: protein glycosylation                               |
| 17: RNA-directed DNA methylation                      | 38: defense response to oomycetes                                           | 58: cellular iron ion homeostasis                       |
| 18: DNA-templated transcription, initiation           | 39: arginine catabolism                                                     | 59: nucleotide-sugar biosynthesis                       |
| 19: phosphorelay signal transduction system           | 40: glutamine metabolism                                                    | 60: negative regulation of transcription, DNA-templated |
| 20: proteolysis                                       | 41: translational initiation                                                |                                                         |
| 21: lipid metabolism                                  |                                                                             |                                                         |

Continue on the next page

## D]

- $C_{Co}$
- $C_{Cg}$
- ▲  $C_{Cg}$  and  $C_{Co}$

- 1: transcription factor activity, sequence-specific DNA binding
- 2: translation initiation factor activity
- 3: catalytic activity
- 4: pyruvate dehydrogenase (acetyl-transferring) activity
- 5: oxidoreductase activity, acting on the aldehyde or oxo group of donors, NAD or NADP as acceptor
- 6: oxoglutarate dehydrogenase (succinyl-transferring) activity
- 7: structural molecule activity
- 8: transporter activity
- 9: RNA ligase (ATP) activity
- 10: tocopherol cyclase activity
- 11: 5-methyltetrahydropteroyltriglutamate-homocysteine S-methyltransferase activity
- 12: inositol-3-phosphate synthase activity
- 13: glyoxalase III activity
- 14: protein dimerization activity
- 15: copper ion binding
- 16: serine-type carboxypeptidase activity
- 17: serine-type peptidase activity
- 18: deaminase activity
- 19: oxidoreductase activity
- 20: steroid binding
- 21: hydrolase activity
- 22: supercoiled DNA binding
- 23: GTP binding
- 24: DNA-directed 5'-3' RNA polymerase activity
- 25: glutaminase activity
- 26: adenine phosphoribosyltransferase activity
- 27: protein prenyltransferase activity
- 28: profilin binding
- 29: MAP-kinase scaffold activity
- 30: polygalacturonase activity
- 31: hydrolase activity, hydrolyzing O-glycosyl compounds
- 32: microtubule motor activity
- 33: core promoter binding
- 34: protein serine/threonine phosphatase activity
- 35: phosphoprotein phosphatase activity
- 36: transferase activity, transferring acyl groups other than amino-acyl groups
- 37: homogentisate 1,2-dioxygenase activity
- 38: L-aspartate oxidase activity
- 39: ubiquitin binding
- 40: NADPH-hemoprotein reductase activity
- 41: ribonucleoside-diphosphate reductase activity, thioredoxin disulfide as acceptor
- 42: 4-hydroxy-tetrahydrodipicolinate reductase
- 43: thiol oxidase activity
- 44: magnesium ion binding
- 45: UDP-glucose 6-dehydrogenase activity
- 46: alternative oxidase activity
- 47: protein domain specific binding
- 48: glycerol kinase activity
- 49: thymidylate kinase activity
- 50: calcium ion binding
- 51: inositol-1,4,5-trisphosphate 3-kinase activity
- 52: DNA binding
- 53: nucleic acid binding
- 54: diacylglycerol cholinephosphotransferase activity
- 55: aspartate kinase activity
- 56: transferase activity, transferring glycosyl groups
- 57: hydrolase activity, acting on ester bonds
- 58: molybdenum ion binding
- 59: mRNA 3'-UTR binding
- 60: ribokinase activity
- 61: 6-phosphofructokinase activity
- 62: 1-phosphatidylinositol 4-kinase activity
- 63: peroxidase activity
- 64: catalase activity
- 65: thioredoxin-disulfide reductase activity
- 66: squalene monooxygenase activity
- 67: cytochrome-c oxidase activity
- 68: pectin acetyltransferase activity
- 69: acylphosphatase activity
- 70: ADP binding
- 71: auxin influx transmembrane transporter activity
- 72: galactoside 2-alpha-L-fucosyltransferase activity
- 73: N6-(1,2-dicarboxyethyl)AMP AMP-lyase (fumarate-forming) activity
- 74: uroporphyrinogen decarboxylase activity
- 75: adenylosuccinate synthase activity
- 76: 3-methyl-2-oxobutanoate hydroxymethyltransferase activity
- 77: protein-L-isoaspartate (D-aspartate) O-methyltransferase activity
- 78: alpha-1,2-mannosyltransferase activity
- 79: allantoin uptake transmembrane transporter activity
- 80: NEDD8 activating enzyme activity
- 81: DNA clamp loader activity
- 82: galactosylgalactosylxyloprotein 3-beta-glucuronosyltransferase activity
- 83: glucose-6-phosphate isomerase activity
- 84: alpha,alpha-trehalase activity
- 85: threonine-tRNA ligase activity
- 86: poly(ADP-ribose) glycohydrolase activity
- 87: nucleotide binding
- 88: RNA binding
- 89: DNA helicase activity
- 90: protein serine/threonine kinase activity
- 91: protein kinase activity
- 92: alpha-L-fucosidase activity
- 93: beta-N-acetylhexosaminidase activity
- 94: histidinol-phosphatase activity
- 95: 3-oxoacyl-[acyl-carrier-protein] reductase (NADPH) activity
- 96: hydroxymethylglutaryl-CoA synthase activity
- 97: citrate (Si)-synthase activity
- 98: D-arabinono-1,4-lactone oxidase activity
- 99: iron ion transmembrane transporter activity
- 100: 3-hydroxyacyl-CoA dehydrogenase activity
- 101: acetyl-CoA C-acetyltransferase activity
- 102: dihydroonepterin aldolase activity
- 103: zinc ion binding
- 104: phospholipase A2 activity
- 105: GTPase activity
- 106: glycerol-3-phosphate dehydrogenase [NAD+] activity
- 107: isocitrate dehydrogenase (NAD+) activity
- 108: gamma-glutamyltransferase activity
- 109: aminoacyl-tRNA editing activity
- 110: asparaginase activity
- 111: metal ion binding
- 112: beta-galactosidase activity
- 113: diphosphomevalonate decarboxylase activity
- 114: fumarate hydratase activity
- 115: 4-hydroxy-tetrahydrodipicolinate synthase
- 116: aspartic-type endopeptidase activity
- 117: dihydroilpoillysine-residue acetyltransferase activity
- 118: peptide alpha-N-acetyltransferase activity
- 119: tryptophan synthase activity
- 120: dodecenoyl-CoA delta-isomerase activity
- 121: protein disulfide isomerase activity
- 122: isopentenyl-diphosphate delta-isomerase activity
- 123: metalloendopeptidase activity

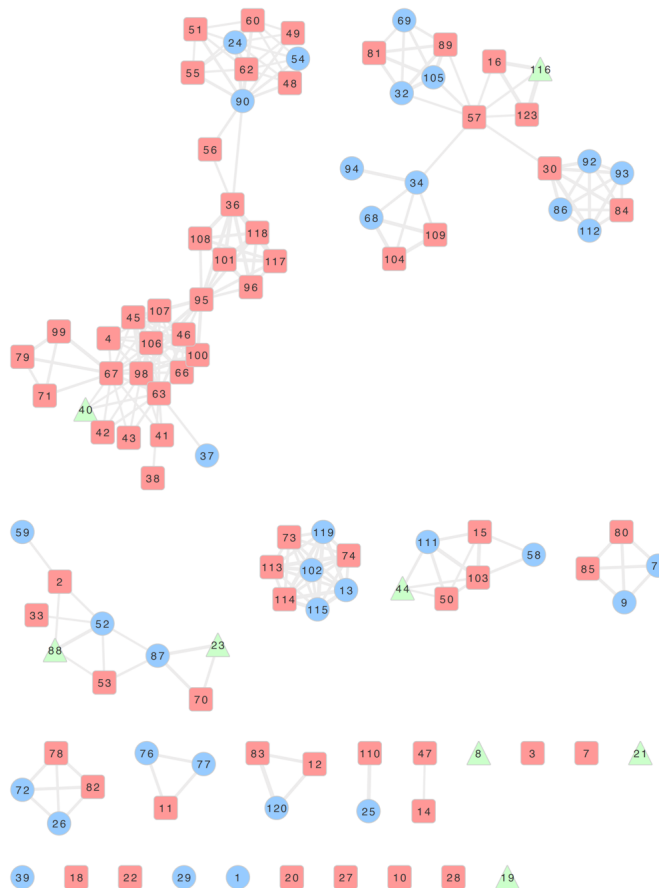

Continue on the next page

**E]**

●  $C_{Co}$   
 ■  $C_{Cg}$   
 ▲  $C_{Cg}$  and  $C_{Co}$

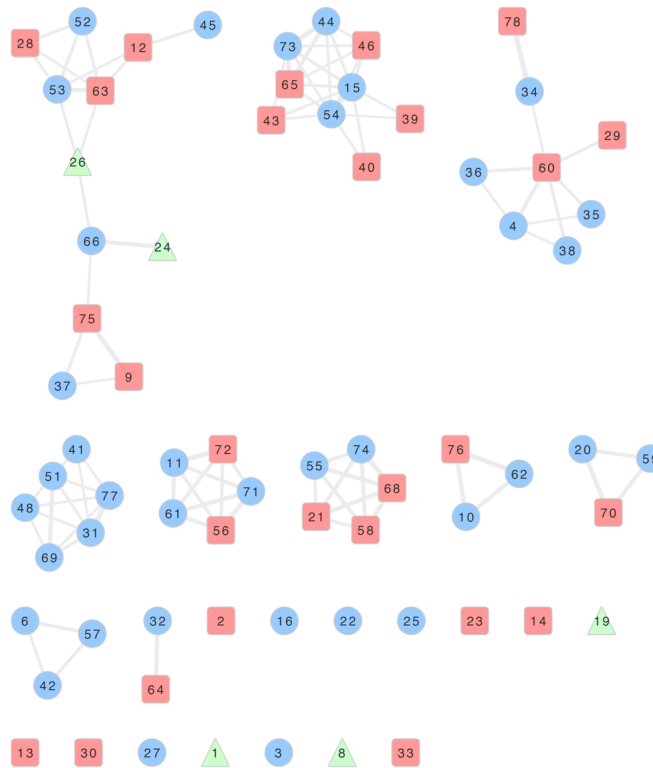

- |                                                                              |                                                             |                                                                                |
|------------------------------------------------------------------------------|-------------------------------------------------------------|--------------------------------------------------------------------------------|
| 1: transcription factor activity, sequence-specific DNA binding              | 27: palmitoyl hydrolase activity                            | 53: DNA binding                                                                |
| 2: structural constituent of ribosome                                        | 28: single-stranded DNA binding                             | 54: N,N-dimethylaniline monooxygenase activity                                 |
| 3: catalytic activity                                                        | 29: ubiquitin-protein transferase activity                  | 55: galactoside 2-alpha-L-fucosyltransferase activity                          |
| 4: ribokinase activity                                                       | 30: DNA helicase activity                                   | 56: dihydropyrimidin aldolase activity                                         |
| 5: galactokinase activity                                                    | 31: protein serine/threonine phosphatase activity           | 57: magnesium ion transmembrane transporter activity                           |
| 6: intracellular cAMP activated cation channel activity                      | 32: polygalacturonase activity                              | 58: galactosylgalactosylxylosylprotein 3-beta-glucuronosyltransferase activity |
| 7: ionotropic glutamate receptor activity                                    | 33: heat shock protein binding                              | 59: tRNA methyltransferase activity                                            |
| 8: binding                                                                   | 34: glutathione transferase activity                        | 60: protein kinase activity                                                    |
| 9: iron ion binding                                                          | 35: phosphomevalonate kinase activity                       | 61: carbon-sulfur lyase activity                                               |
| 10: chorismate mutase activity                                               | 36: phosphatidate cytidyltransferase activity               | 62: UDP-glucose 4-epimerase activity                                           |
| 11: glyoxalase III activity                                                  | 37: magnesium ion binding                                   | 63: RNA binding                                                                |
| 12: translation initiation factor activity                                   | 38: riboflavin kinase activity                              | 64: beta-N-acetylhexosaminidase activity                                       |
| 13: threonine-tRNA ligase activity                                           | 39: dihydroorotate dehydrogenase activity                   | 65: long-chain-alcohol oxidase activity                                        |
| 14: protein dimerization activity                                            | 40: succinate-semialdehyde dehydrogenase [NAD(P)+] activity | 66: ATP binding                                                                |
| 15: peroxidase activity                                                      | 41: single-stranded DNA 5'-3' exodeoxyribonuclease activity | 67: nucleotide binding                                                         |
| 16: serine-type carboxypeptidase activity                                    | 42: inorganic phosphate transmembrane transporter activity  | 68: cellulose synthase (UDP-forming) activity                                  |
| 17: serine-type endopeptidase activity                                       | 43: methylenetetrahydrofolate reductase (NAD(P)H) activity  | 69: aminoacyl-tRNA hydrolase activity                                          |
| 18: omega peptidase activity                                                 | 44: 3-isopropylmalate dehydrogenase activity                | 70: phosphoethanolamine N-methyltransferase activity                           |
| 19: oxidoreductase activity                                                  | 45: double-stranded RNA binding                             | 71: glutamate decarboxylase activity                                           |
| 20: phosphatidyl-N-methylethanolamine N-methyltransferase activity           | 46: peptide-methionine (S)-S-oxide reductase activity       | 72: 4-hydroxy-tetrahydrodipicolinate synthase                                  |
| 21: dolichyl-phosphate-glucose-glycolipid alpha-glucosyltransferase activity | 47: peptide-methionine (R)-S-oxide reductase activity       | 73: phosphogluconate dehydrogenase (decarboxylating) activity                  |
| 22: transketolase activity                                                   | 48: tRNA-intron endonuclease activity                       | 74: glycogen (starch) synthase activity                                        |
| 23: thiosulfate sulfurtransferase activity                                   | 49: 3'-5'-exoribonuclease activity                          | 75: zinc ion binding                                                           |
| 24: GTP binding                                                              | 50: ribonuclease III activity                               | 76: intramolecular transferase activity                                        |
| 25: profilin binding                                                         | 51: methyl jasmonate esterase activity                      | 77: nucleotidase activity                                                      |
| 26: nucleic acid binding                                                     | 52: double-stranded DNA binding                             | 78: methionine adenosyltransferase activity                                    |

Continue on the next page

**F]**

●  $C_{Co}$   
 ■  $C_{Cg}$   
 ▲  $C_{Cg}$  and  $C_{Co}$

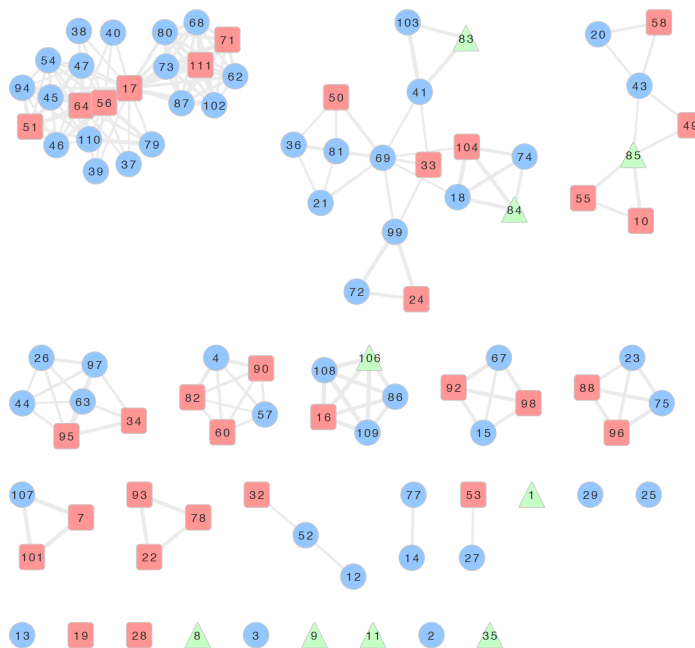

- |                                                                 |                                                                                      |                                                                        |
|-----------------------------------------------------------------|--------------------------------------------------------------------------------------|------------------------------------------------------------------------|
| 1: transcription factor activity, sequence-specific DNA binding | 42: acetyl-CoA:L-glutamate N-acetyltransferase activity                              | 77: ribose-5-phosphate isomerase activity                              |
| 2: transcription corepressor activity                           | 43: RNA binding                                                                      | 78: beta-ureidopropionase activity                                     |
| 3: catalytic activity                                           | 44: magnesium ion binding                                                            | 79: nitronate monooxygenase activity                                   |
| 4: acid phosphatase activity                                    | 45: NADPH-hemoprotein reductase activity                                             | 80: ammonium transmembrane transporter activity                        |
| 5: phosphoprotein phosphatase activity                          | 46: ribonucleoside-diphosphate reductase activity, thioredoxin disulfide as acceptor | 81: NAD+ kinase activity                                               |
| 6: protein serine/threonine phosphatase activity                | 47: protochlorophyllide reductase activity                                           | 82: histidinol-phosphatase activity                                    |
| 7: GDP-dissociation inhibitor activity                          | 48: 4-hydroxy-tetrahydrodipicolinate reductase                                       | 83: arginyltransferase activity                                        |
| 8: transporter activity                                         | 49: nucleic acid binding                                                             | 84: 3-methyl-2-oxobutanoate hydroxymethyltransferase activity          |
| 9: binding                                                      | 50: pantothenate kinase activity                                                     | 85: nucleotide binding                                                 |
| 10: GTP binding                                                 | 51: peptide-methionine (S)-S-oxide reductase activity                                | 86: glutamate-ammonia ligase activity                                  |
| 11: electron carrier activity                                   | 52: protein dimerization activity                                                    | 87: inorganic phosphate transmembrane transporter activity             |
| 12: protein heterodimerization activity                         | 53: double-stranded RNA binding                                                      | 88: alpha-amylase activity                                             |
| 13: tocopherol cyclase activity                                 | 54: alternative oxidase activity                                                     | 89: beta-amylase activity                                              |
| 14: inositol-3-phosphate synthase activity                      | 55: NAD binding                                                                      | 90: phosphatidylinositol phospholipase C activity                      |
| 15: glyoxalase III activity                                     | 56: N,N-dimethylaniline monooxygenase activity                                       | 91: phospholipase D activity                                           |
| 16: threonine-tRNA ligase activity                              | 57: pectin acetyltransferase activity                                                | 92: adenosylmethionine decarboxylase activity                          |
| 17: cytochrome-c oxidase activity                               | 58: transcription regulatory region sequence-specific DNA binding                    | 93: asparaginase activity                                              |
| 18: O-methyltransferase activity                                | 59: core promoter proximal region sequence-specific DNA binding                      | 94: thiol oxidase activity                                             |
| 19: oxidoreductase activity                                     | 60: 3'-5'-exoribonuclease activity                                                   | 95: zinc ion binding                                                   |
| 20: single-stranded DNA binding                                 | 61: ribonuclease III activity                                                        | 96: chitinase activity                                                 |
| 21: thymidylate kinase activity                                 | 62: UDP-galactose transmembrane transporter activity                                 | 97: metal ion binding                                                  |
| 22: AMP deaminase activity                                      | 63: copper ion binding                                                               | 98: dihydroneopterin aldolase activity                                 |
| 23: 1,2-alpha-L-fucosidase activity                             | 64: peroxidase activity                                                              | 99: UDP-glucosyltransferase activity                                   |
| 24: 1,4-alpha-glucan branching enzyme activity                  | 65: catalase activity                                                                | 100: cellulose synthase (UDP-forming) activity                         |
| 25: acetolactate synthase activity                              | 66: superoxide dismutase activity                                                    | 101: enzyme inhibitor activity                                         |
| 26: calcium ion binding                                         | 67: 1,4-dihydroxy-2-naphthoyl-CoA synthase activity                                  | 102: intracellular cAMP activated cation channel activity              |
| 27: translation release factor activity                         | 68: voltage-gated chloride channel activity                                          | 103: diacylglycerol O-acyltransferase activity                         |
| 28: Ran GTPase binding                                          | 69: protein serine/threonine kinase activity                                         | 104: histone-lysine N-methyltransferase activity                       |
| 29: serine-type endopeptidase activity                          | 70: protein kinase activity                                                          | 105: protein-L-isoaspartate (D-aspartate) O-methyltransferase activity |
| 30: serine-type carboxypeptidase activity                       | 71: protein transporter activity                                                     | 106: cysteine-tRNA ligase activity                                     |
| 31: metalloendopeptidase activity                               | 72: galactoside 2-alpha-L-fucosyltransferase activity                                | 107: Rab GDP-dissociation inhibitor activity                           |
| 32: actin binding                                               | 73: allantoin uptake transmembrane transporter activity                              | 108: glycine-tRNA ligase activity                                      |
| 33: ubiquitin-protein transferase activity                      | 74: aspartate carbamoyltransferase activity                                          | 109: proline-tRNA ligase activity                                      |
| 34: manganese ion binding                                       | 75: polygalacturonase activity                                                       | 110: acireductone dioxigenase [iron(II)-requiring] activity            |
| 35: GTPase activity                                             | 76: hydrolase activity, hydrolyzing O-glycosyl compounds                             | 111: potassium ion transmembrane transporter activity                  |
| 36: shikimate kinase activity                                   |                                                                                      | 112: iron ion transmembrane transporter activity                       |
| 37: L-lactate dehydrogenase activity                            |                                                                                      |                                                                        |
| 38: sarcosine oxidase activity                                  |                                                                                      |                                                                        |
| 39: formate dehydrogenase (NAD+) activity                       |                                                                                      |                                                                        |
| 40: nitrite reductase [NAD(P)H] activity                        |                                                                                      |                                                                        |
| 41: N-acetyltransferase activity                                |                                                                                      |                                                                        |

**Fig. S9. Network shared names of enriched biological processes (A, B and C) or molecular functions (D, E and F) GO term for genes showing convergence in expression between subgenomes in flowers (A and D), leaves (B and E) or roots tissues (C and F).  $C_o$  indicates a convergence of  $C_{bp_{Cg}}$  toward  $C_{bp_{Co}}$ , and  $C_g$  corresponds to a convergence of  $C_{bp_{Co}}$  toward  $C_{bp_{Cg}}$ .**
