# Supplementary material for: Towards the new normal: Transcriptomic convergence and genomic legacy of the two subgenomes of an allopolyploid weed (Capsella bursa-pastoris)
Source: PubMed Central journal article supplement (PMC6532933; doi:10.1371/journal.pgen.1008131), 2019-05-13
Supplement: pgen.1008131.s012.pdf [file pgen.1008131.s012.pdf]

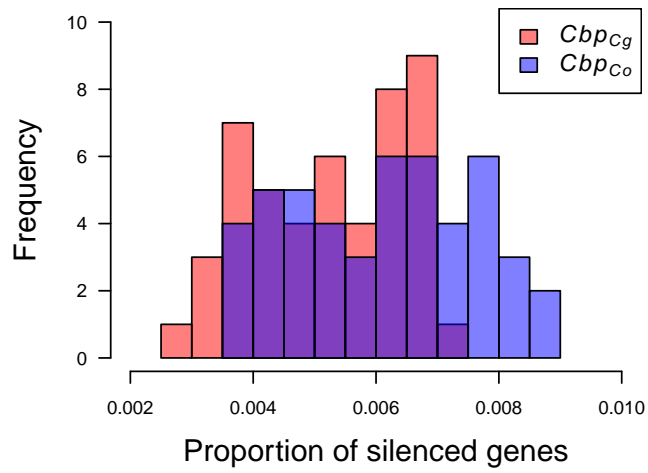

Fig. S12. The difference in the number of silenced genes between subgenomes of *C. bursa-pastoris*.
