# Supplementary material for: Towards the new normal: Transcriptomic convergence and genomic legacy of the two subgenomes of an allopolyploid weed (Capsella bursa-pastoris)
Source: PubMed Central journal article supplement (PMC6532933; doi:10.1371/journal.pgen.1008131), 2019-05-13
Supplement: pgen.1008131.s013.pdf [file pgen.1008131.s013.pdf]

| Accession   | Population | Latitude | Longitude | DNA lib.size | Flower RNA lib.size | Leaf RNA lib.size | Root RNA lib.size | DNA-Seq (SRA) | Flower RNA-Seq (SRA) | Leaf RNA-Seq (SRA) | Root RNA-Seq (SRA) |
|-------------|------------|----------|-----------|--------------|---------------------|-------------------|-------------------|---------------|----------------------|--------------------|--------------------|
| DL174       | ASI        | 38.56    | 121.35    | 76005581     | 74101388            | 65425962          | 51624022          | SRS2762453    | SRR8944199           | SRR8944136         | SRR8944193         |
| JZH152      | ASI        | 30.20    | 112.06    | 80652085     | 61417236            | 61334938          | 37507282          | SRS2762444    | SRR8944198           | SRR8944137         | SRR8944192         |
| NJ219       | ASI        | 32.03    | 118.46    | 67776611     | 62976278            | 87650066          | 46483576          | SRS2762448    | SRR8944172           | SRR8944134         | SRR8944191         |
| TY118       | ASI        | 37.55    | 112.32    | 68816910     | 53541728            | 60561340          | 58656088          | SRS2762440    | SRR8944166           | SRR8944135         | SRR8944190         |
| DUB-RUS9    | CASI       | 51.53    | 58.85     | 84128727     | 78319556            | 68099236          | 54375028          | SRR8904462    | SRR8944201           | SRR8944151         | SRR8944130         |
| KYRG-3-14   | CASI       | 39.79    | 72.18     | 45154567     | 66059762            | 60694436          | 57074026          | SRR8904463    | SRR8944200           | SRR8944152         | SRR8944133         |
| LAB-RUS-4   | CASI       | 66.65    | 66.40     | 33843140     | 69017208            | 61974690          | 39439188          | SRR8904464    | SRR8944181           | SRR8944157         | SRR8944148         |
| TACH-CHIN14 | CASI       | 47.07    | 83.01     | 83324082     | 61379494            | 77626154          | 38668184          | SRR8904465    | SRR8944184           | SRR8944158         | SRR8944149         |
| 85.3        | CG         | 39.56    | 20.92     | 57969763     | 55106794            | 68729596          | 59193184          | SRR8904467    | SRR8944183           | SRR8944155         | SRR8944173         |
| 86.12       | CG         | 39.52    | 20.97     | 71852215     | 70392238            | 54187192          | 62579512          | SRR8904468    | SRR8944182           | SRR8944156         | SRR8944169         |
| 87.26       | CG         | 39.48    | 20.98     | 60716530     | 62728886            | 59460660          | 64762960          | SRR8904469    | SRR8944195           | SRR8944146         | SRR8944177         |
| 88.5        | CG         | 39.88    | 20.75     | 45369106     | 67964672            | 44978638          | 47326734          | SRR8904470    | SRR8944178           | SRR8944147         | SRR8944175         |
| GUB-RUS5    | CO         | 51.29    | 58.18     | 55352931     | 58041160            | 55549182          | 61419992          | SRR8904471    | SRR8944179           | SRR8944189         | SRR8944174         |
| PAR-RUS     | CO         | 53.30    | 60.10     | 49028787     | 68030766            | 55527408          | 57415936          | SRR8904459    | SRR8944144           | SRR8944188         | SRR8944150         |
| QH-CHIN4    | CO         | 46.70    | 90.83     | 46773214     | 66241216            | 55334438          | 57763206          | SRR8904460    | SRR8944167           | SRR8944187         | SRR8944165         |
| URAL-RUS4   | CO         | 55.11    | 61.39     | 45387760     | 76656450            | 57886342          | 69234050          | SRR8904461    | SRR8944180           | SRR8944186         | SRR8944159         |
| FR50        | EUR        | 48.08    | 7.37      | 70612809     | 57720098            | 46159028          | 33748500          | SRS2762459    | SRR8944163           | SRR8944140         | SRR8944197         |
| SE33        | EUR        | 56.15    | 13.77     | 78120829     | 61139124            | 66478952          | 49599858          | SRS2762447    | SRR8944164           | SRR8944141         | SRR8944196         |
| STA4        | EUR        | 56.20    | -2.47     | 76063405     | 64453046            | 52318632          | 42635412          | SRS2762460    | SRR8944161           | SRR8944176         | SRR8944138         |
| STJ2        | EUR        | 44.51    | -1.21     | 77687488     | 85809658            | 48134448          | 35801122          | SRS2762442    | SRR8944162           | SRR8944139         | SRR8944142         |
| AL87        | ME         | 35.45    | 7.96      | 59970536     | 76995752            | 57011620          | 54660030          | SRS2762455    | SRR8944168           | SRR8944131         | SRR8944143         |
| JO56        | ME         | 31.97    | 35.98     | 79470603     | 56584612            | 61885264          | 60461952          | SRS2762457    | SRR8944160           | SRR8944132         | SRR8944145         |
| TR73        | ME         | 41.02    | 28.97     | 77624846     | 59569756            | 69614876          | 44957844          | SRS2762445    | SRR8944170           | SRR8944153         | SRR8944185         |
| JO59        | ME         | 31.97    | 35.98     | 67354447     | 67068132            | 68539844          | 53689276          | SRR8904466    | SRR8944171           | SRR8944154         | SRR8944194         |
