# Supplementary material for: Towards the new normal: Transcriptomic convergence and genomic legacy of the two subgenomes of an allopolyploid weed (Capsella bursa-pastoris)
Source: PubMed Central journal article supplement (PMC6532933; doi:10.1371/journal.pgen.1008131), 2019-05-13
Supplement: pgen.1008131.s014.pdf [file pgen.1008131.s014.pdf]

**Table S2.** Differential gene expression between three *Capsella* species in three tissues.

| Tissue  | Comparison |             |             |
|---------|------------|-------------|-------------|
|         | CO vs CG   | Cbp vs CG   | Cbp vs CO   |
| Flowers | 4793       | 4214        | <b>2796</b> |
| Leaves  | 1729       | <b>1172</b> | 1535        |
| Roots   | 2742       | <b>2047</b> | 3537        |

CO, CG, and Cbp correspond to *C. orientalis*, *C. grandiflora*, and *C. bursa-pastoris*, respectively. The analysis was performed on the unphased expression data of 16,032 genes with the significance level set to 0.05. The smallest differences between species per tissue are in bold.
