# Supplementary material for: Towards the new normal: Transcriptomic convergence and genomic legacy of the two subgenomes of an allopolyploid weed (Capsella bursa-pastoris)
Source: PubMed Central journal article supplement (PMC6532933; doi:10.1371/journal.pgen.1008131), 2019-05-13
Supplement: pgen.1008131.s015.pdf [file pgen.1008131.s015.pdf]

**Table S3.** Differential gene expression between *Capsella* species/population in three tissues.

| Tissue  | Comparison |           |             |             |           |           |             |             |            |           |           |             |             |            |  |
|---------|------------|-----------|-------------|-------------|-----------|-----------|-------------|-------------|------------|-----------|-----------|-------------|-------------|------------|--|
|         | CG vs ASI  | CG vs EUR | CG vs ME    | CG vs CASI  | CO vs ASI | CO vs EUR | CO vs ME    | CO vs CASI  | ASI vs EUR | ASI vs ME | EUR vs ME | ASI vs CASI | EUR vs CASI | ME vs CASI |  |
| Flowers | 3946       | 3677      | 3723        | <b>3395</b> | 2467      | 3069      | 2358        | <b>2084</b> | 907        | 908       | 680       | 645         | <b>62</b>   | 458        |  |
| Leaves  | <b>851</b> | 1192      | 1031        | 1055        | 1154      | 1392      | <b>978</b>  | 1612        | 394        | 551       | 245       | 360         | <b>7</b>    | 212        |  |
| Roots   | 1868       | 2123      | <b>1533</b> | 1592        | 2167      | 4000      | <b>2138</b> | 3305        | 847        | 1052      | 514       | 570         | <b>7</b>    | 358        |  |

CO, CG, ASI, CASI, EUR, and ME correspond to *C. orientalis*, *C. grandiflora*, and four populations of *C. bursa-pastoris*, respectively. The analysis was performed on the unphased expression data of 16,032 genes with the significance level set to 0.05. The smallest differences between species/population per tissue are in bold.
