# Supplementary material for: Towards the new normal: Transcriptomic convergence and genomic legacy of the two subgenomes of an allopolyploid weed (Capsella bursa-pastoris)
Source: PubMed Central journal article supplement (PMC6532933; doi:10.1371/journal.pgen.1008131), 2019-05-13
Supplement: pgen.1008131.s017.pdf [file pgen.1008131.s017.pdf]

**Table S5.** Differentially expressed genes between tissues (A) and populations within tissues (B) for each *C. bursa-pastoris* subgenomes.

**A**

| <b>Contrast</b> | <b><i>Cbp<sub>Co</sub></i></b> | <b>%</b>  | <b><i>Cbp<sub>Cg</sub></i></b> | <b>%</b>  | <b><math>\Delta\%</math></b> |
|-----------------|--------------------------------|-----------|--------------------------------|-----------|------------------------------|
| <b>F vs L</b>   | <b>6474</b>                    | <b>54</b> | <b>6475</b>                    | <b>54</b> | <b>0</b>                     |
| F vs R          | 5922                           | 50        | 6003                           | 50        | -1                           |
| L vs R          | 5545                           | 46        | 5688                           | 48        | -1                           |

F: Flowers, L: leaves and R: Roots. *FDR* < 0.05.

**B**

| <b>Flowers: 4029</b> |                                |          |                                |          |                              |
|----------------------|--------------------------------|----------|--------------------------------|----------|------------------------------|
| <b>Contrast</b>      | <b><i>Cbp<sub>Co</sub></i></b> | <b>%</b> | <b><i>Cbp<sub>Cg</sub></i></b> | <b>%</b> | <b><math>\Delta\%</math></b> |
| ME vs ASI            | <b>279</b>                     | <b>7</b> | 223                            | 6        | 1                            |
| ME vs CASI           | 214                            | 5        | 182                            | 5        | 1                            |
| ME vs EUR            | 216                            | 5        | 182                            | 5        | 1                            |
| ASI vs CASI          | 192                            | 5        | 198                            | 5        | 0                            |
| ASI vs EUR           | 268                            | 7        | <b>259</b>                     | <b>6</b> | 0                            |
| CASI vs EUR          | <b>88</b>                      | <b>2</b> | 112                            | 3        | -1                           |
| <b>Leaves: 3051</b>  |                                |          |                                |          |                              |
| <b>Contrast</b>      | <b><i>Cbp<sub>Co</sub></i></b> | <b>%</b> | <b><i>Cbp<sub>Cg</sub></i></b> | <b>%</b> | <b><math>\Delta\%</math></b> |
| ME vs ASI            | <b>248</b>                     | <b>8</b> | <b>236</b>                     | <b>8</b> | 0                            |
| ME vs CASI           | 162                            | 5        | 134                            | 4        | 1                            |
| ME vs EUR            | 132                            | 4        | 133                            | 4        | 0                            |
| ASI vs CASI          | 170                            | 6        | 177                            | 6        | 0                            |
| ASI vs EUR           | 156                            | 5        | 168                            | 6        | 0                            |
| CASI vs EUR          | 14                             | 0        | 20                             | 1        | 0                            |
| <b>Roots: 3759</b>   |                                |          |                                |          |                              |
| <b>Contrast</b>      | <b><i>Cbp<sub>Co</sub></i></b> | <b>%</b> | <b><i>Cbp<sub>Cg</sub></i></b> | <b>%</b> | <b><math>\Delta\%</math></b> |
| ME vs ASI            | <b>256</b>                     | <b>7</b> | <b>243</b>                     | <b>6</b> | 0                            |
| ME vs CASI           | 137                            | 4        | 125                            | 3        | 0                            |
| ME vs EUR            | 212                            | 6        | 180                            | 5        | 1                            |
| ASI vs CASI          | 165                            | 4        | 174                            | 5        | 0                            |
| ASI vs EUR           | 251                            | 7        | 241                            | 6        | 0                            |
| CASI vs EUR          | 23                             | 1        | 34                             | 1        | 0                            |

ASI: Asia, CASI: central Asia, EUR: Europe and ME: Middle-East. *FDR* < 0.05.
