# Supplementary material for: Towards the new normal: Transcriptomic convergence and genomic legacy of the two subgenomes of an allopolyploid weed (Capsella bursa-pastoris)
Source: PubMed Central journal article supplement (PMC6532933; doi:10.1371/journal.pgen.1008131), 2019-05-13
Supplement: pgen.1008131.s018.pdf [file pgen.1008131.s018.pdf]

**Table S6.** Overlap between expression profiles in gene ontology term enrichment for Biological processes (A) and Molecular functions (B).

**A**

| Biological processes Flowers |             |         |         |      |      |      |        |
|------------------------------|-------------|---------|---------|------|------|------|--------|
| Categories                   | Comp. Drift | Dom. CG | Dom. CO | Int. | Leg. | Rev. | Trans. |
| Dominance CG                 | 0           | -       | -       | -    | -    | -    | -      |
| Dominance CO                 | 12          | 13      | -       | -    | -    | -    | -      |
| Intermediate                 | 12          | 0       | 3       | -    | -    | -    | -      |
| Legacy                       | 9           | 3       | 9       | 17   | -    | -    | -      |
| Reverse                      | 0           | 0       | 0       | 6    | 3    | -    | -      |
| Transgressive                | 9           | 2       | 5       | 7    | 12   | 2    | -      |
| No difference                | 3           | 3       | 4       | 6    | 3    | 1    | 8      |
| Biological processes Leaves  |             |         |         |      |      |      |        |
| Categories                   | Comp. Drift | Dom. CG | Dom. CO | Int. | Leg. | Rev. | Trans. |
| Dominance CG                 | 19          | -       | -       | -    | -    | -    | -      |
| Dominance CO                 | 0           | 0       | -       | -    | -    | -    | -      |
| Intermediate                 | 14          | 14      | 0       | -    | -    | -    | -      |
| Legacy                       | 14          | 5       | 5       | 18   | -    | -    | -      |
| Reverse                      | 0           | 0       | 0       | 0    | 0    | -    | -      |
| Transgressive                | 3           | 0       | 9       | 0    | 3    | 0    | -      |
| No difference                | 4           | 5       | 2       | 5    | 3    | 0    | 5      |
| Biological processes Roots   |             |         |         |      |      |      |        |
| Categories                   | Comp. Drift | Dom. CG | Dom. CO | Int. | Leg. | Rev. | Trans. |
| Dominance CG                 | 11          | -       | -       | -    | -    | -    | -      |
| Dominance CO                 | 0           | 7       | -       | -    | -    | -    | -      |
| Intermediate                 | 9           | 7       | 9       | -    | -    | -    | -      |
| Legacy                       | 14          | 11      | 5       | 9    | -    | -    | -      |
| Reverse                      | 0           | 0       | 0       | 5    | 5    | -    | -      |
| Transgressive                | 6           | 10      | 8       | 10   | 6    | 2    | -      |
| No difference                | 3           | 6       | 2       | 5    | 1    | 1    | 11     |

**B**

| Molecular functions Flowers |             |         |         |      |      |      |        |
|-----------------------------|-------------|---------|---------|------|------|------|--------|
| Categories                  | Comp. Drift | Dom. CG | Dom. CO | Int. | Leg. | Rev. | Trans. |
| Dominance CG                | 4           | -       | -       | -    | -    | -    | -      |
| Dominance CO                | 11          | 5       | -       | -    | -    | -    | -      |
| Intermediate                | 14          | 7       | 10      | -    | -    | -    | -      |
| Legacy                      | 16          | 7       | 19      | 21   | -    | -    | -      |
| Reverse                     | 5           | 12      | 6       | 5    | 4    | -    | -      |
| Transgressive               | 17          | 4       | 14      | 11   | 14   | 1    | -      |
| No difference               | 9           | 1       | 7       | 1    | 10   | 1    | 7      |
| Molecular functions Leaves  |             |         |         |      |      |      |        |
| Categories                  | Comp. Drift | Dom. CG | Dom. CO | Int. | Leg. | Rev. | Trans. |
| Dominance CG                | 6           | -       | -       | -    | -    | -    | -      |
| Dominance CO                | 0           | 21      | -       | -    | -    | -    | -      |
| Intermediate                | 10          | 10      | 8       | -    | -    | -    | -      |
| Legacy                      | 12          | 12      | 12      | 18   | -    | -    | -      |
| Reverse                     | 3           | 14      | 15      | 4    | 7    | -    | -      |
| Transgressive               | 8           | 8       | 2       | 20   | 8    | 3    | -      |
| No difference               | 3           | 5       | 3       | 3    | 7    | 2    | 2      |
| Molecular functions Roots   |             |         |         |      |      |      |        |
| Categories                  | Comp. Drift | Dom. CG | Dom. CO | Int. | Leg. | Rev. | Trans. |
| Dominance CG                | 5           | -       | -       | -    | -    | -    | -      |
| Dominance CO                | 5           | 11      | -       | -    | -    | -    | -      |
| Intermediate                | 13          | 12      | 10      | -    | -    | -    | -      |
| Legacy                      | 14          | 20      | 7       | 17   | -    | -    | -      |
| Reverse                     | 7           | 3       | 4       | 5    | 2    | -    | -      |
| Transgressive               | 13          | 8       | 8       | 14   | 9    | 8    | -      |
| No difference               | 6           | 7       | 4       | 3    | 4    | 1    | 12     |
