# Supplementary material for: Towards the new normal: Transcriptomic convergence and genomic legacy of the two subgenomes of an allopolyploid weed (Capsella bursa-pastoris)
Source: PubMed Central journal article supplement (PMC6532933; doi:10.1371/journal.pgen.1008131), 2019-05-13
Supplement: pgen.1008131.s019.pdf [file pgen.1008131.s019.pdf]

Table S7. Overlap between tissue in expression profiles gene ontology term enrichment for Biological processes (A) and Molecular functions (B).

**A**

| Categories    | Biological processes |        |        |             |        |
|---------------|----------------------|--------|--------|-------------|--------|
|               | F vs L               | F vs R | L vs R | F vs L vs R | Single |
| Reverse       | 0                    | 22     | 11     | 0           | 67     |
| Transgressive | 3                    | 14     | 10     | 4           | 69     |
| Legacy        | 2                    | 9      | 7      | 2           | 80     |
| Dominance CG  | 8                    | 8      | 3      | 0           | 81     |
| Comp. drift   | 5                    | 7      | 2      | 0           | 86     |
| Intermediate  | 3                    | 2      | 5      | 2           | 88     |
| Dominance CO  | 3                    | 6      | 0      | 0           | 91     |
| Average       | 3                    | 10     | 5      | 1           | 80     |

**B**

| Categories    | Molecular functions |        |        |             |        |
|---------------|---------------------|--------|--------|-------------|--------|
|               | F vs L              | F vs R | L vs R | F vs L vs R | Single |
| Transgressive | 2                   | 15     | 4      | 7           | 72     |
| Reverse       | 0                   | 10     | 10     | 5           | 75     |
| Intermediate  | 2                   | 9      | 8      | 3           | 78     |
| Legacy        | 5                   | 11     | 3      | 2           | 79     |
| Dominance CG  | 5                   | 7      | 8      | 0           | 80     |
| Comp. Drift   | 4                   | 7      | 6      | 2           | 81     |
| Dominance CO  | 4                   | 5      | 1      | 4           | 86     |
| Average       | 3                   | 9      | 6      | 3           | 79     |
